# Supplementary material
Source: MDPI journal article supplement (https://www.mdpi.com/2073-4433/14/8/1199)
Supplement: s1 [file s1]

Table S1. Correlation matrix between chronologies

|                          | <i>Pinus cembroides</i> | <i>Pinus engelmannii</i> | <i>Pinus leiophylla</i> |
|--------------------------|-------------------------|--------------------------|-------------------------|
| <i>Pinus cembroides</i>  | 1.000                   | 0.548                    | 0.633                   |
| <i>Pinus engelmannii</i> |                         | 1.000                    | 0.645                   |
| <i>Pinus leiophylla</i>  |                         |                          | 1.000                   |
